# Supplementary material
Source: Springer Nature journal article supplement (https://www.springermedizin.de/resource/supplementary/12933_2010_256_MOESM4_ESM.pdf/9539950)

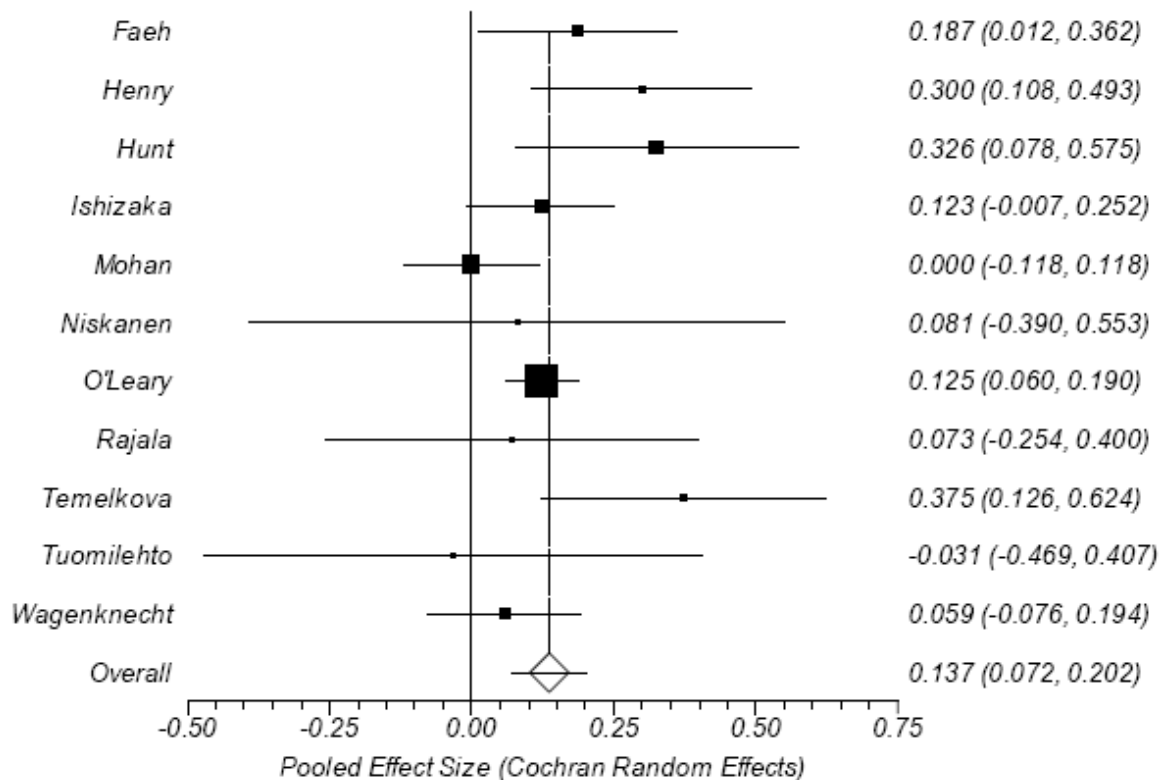

Supplement: MOESM4 [file 9539950]
